# Supplementary material
Source: Springer Nature journal article supplement (https://www.springermedizin.de/resource/supplementary/13014_2012_772_MOESM5_ESM.pdf/9634696)

# Use of Boost by Reconstruction Type and Country

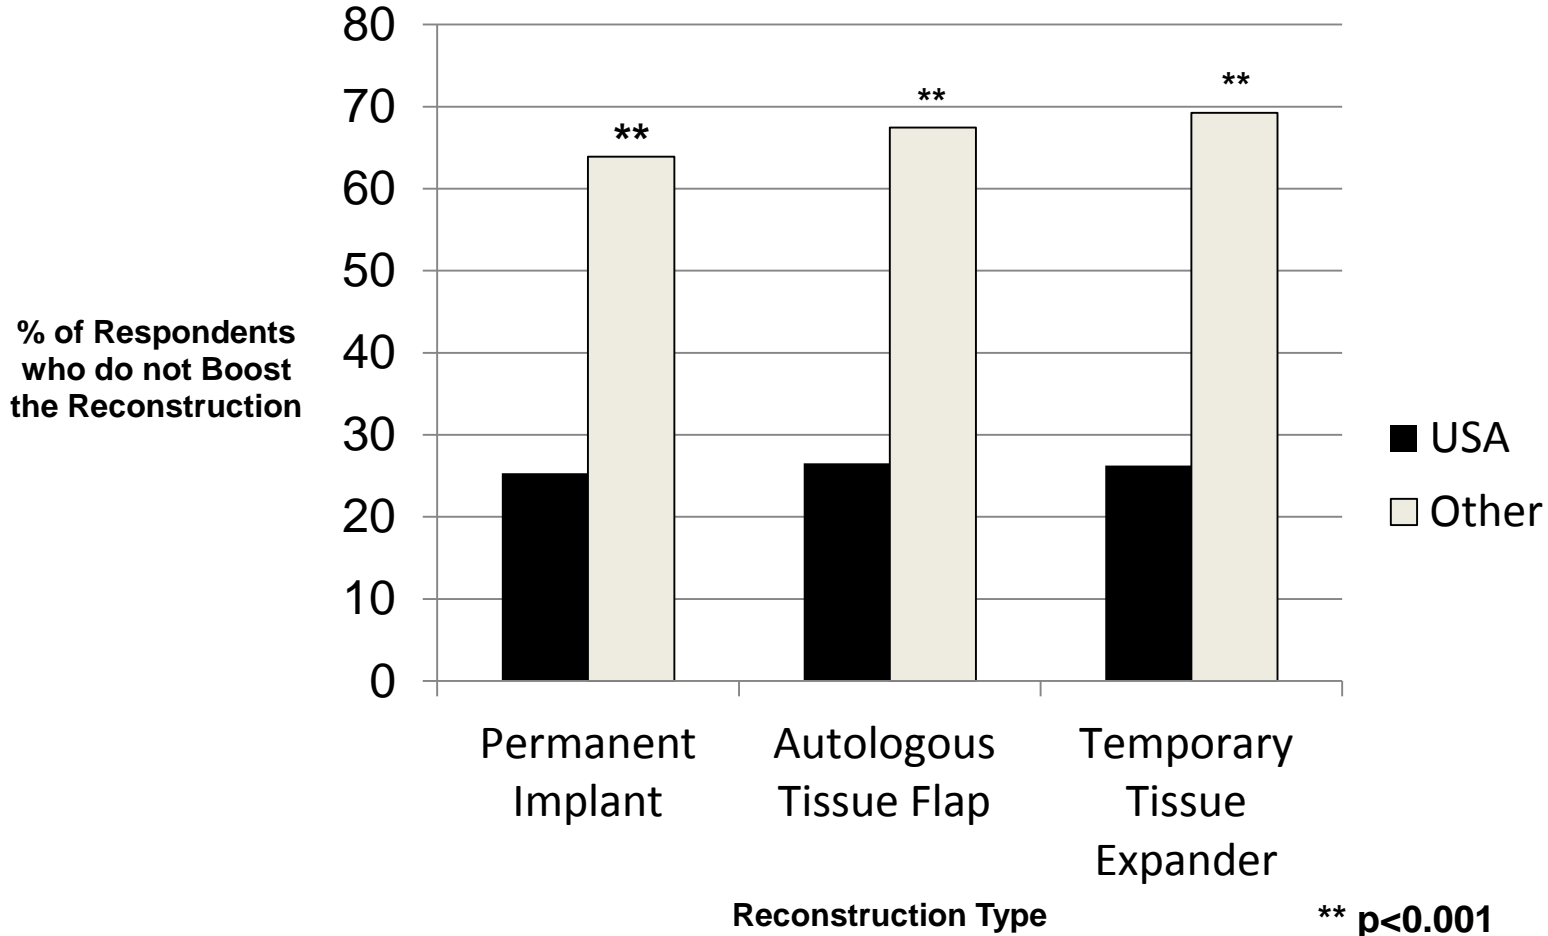

Supplement: MOESM5 [file 9634696]
